# Supplementary material for: Identification of inflammation-related DNA methylation biomarkers in periodontitis patients based on weighted co-expression analysis
Source: publisher site journal article supplement (doi:10.18632/aging.203378), 2021-08-04
Supplement: Supplementary file [file aging-v13i15-203378-supplementary-material-SD1.pdf]

## SUPPLEMENTARY FIGURES

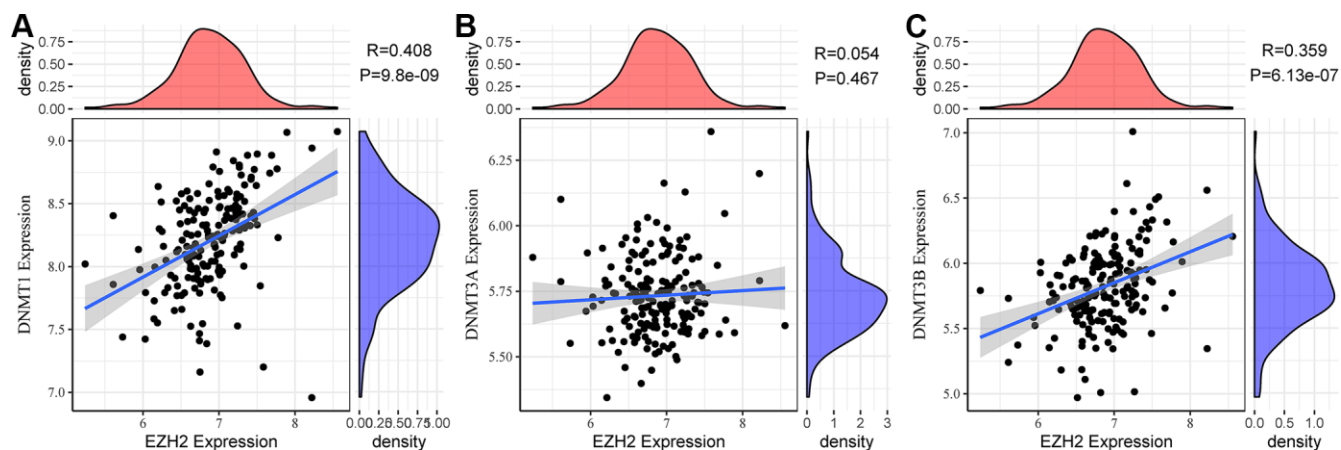

**Supplementary Figure 1. Correlation between EZH2 and DNMT expression.** (A) Correlation between EZH2 and DNMT1 expression. (B) Correlation between EZH2 and DNMT3A expression. (C) Correlation between EZH2 and DNMT3B expression.

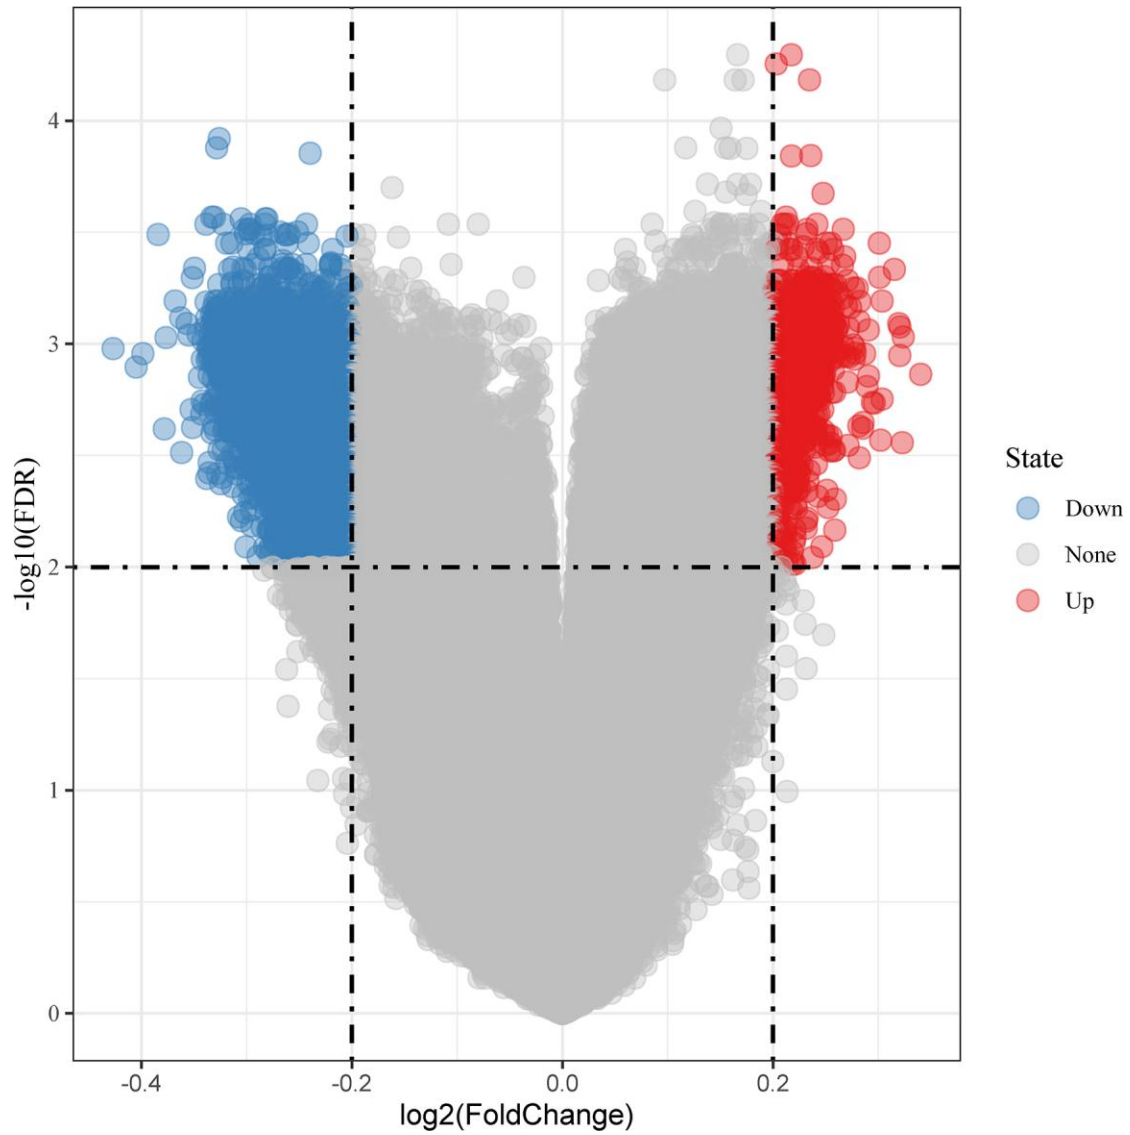

Supplementary Figure 2. Volcanic map of methylation difference, x axis is the difference multiple, y axis is the difference significance, red is the up-regulation of DMPs, green is the down-regulation of DMPs.
